# Supplementary material for: Self-healable poly(acrylic acid-co-maleic acid)/glycerol/boron nitride nanosheet composite hydrogels at low temperature with enhanced mechanical properties and water retention
Source: Royal Society of Chemistry journal article supplement (doi:10.1039/c9sm00179d), 2019-01-01
Supplement: c9sm00179d1.pdf [file c9sm00179d1.pdf]

**Self-healable poly(acrylic acid-co-maleic acid)/glycerol/boron nitride nanosheets composite hydrogels at low temperature with enhanced mechanical property and water retention**

Shishan Xue,<sup>a</sup> Yuanpeng Wu,<sup>\*a,b</sup> Meiling Guo,<sup>a</sup> Yuanmeng Xia,<sup>a</sup> Dan Liu,<sup>d</sup> Hongwei Zhou,<sup>\*c</sup> and Weiwei Lei<sup>\*d</sup>

<sup>a</sup>. School of Materials Science and Engineering, Southwest Petroleum University, Chengdu 610500, China. E-mail: ypwu@swpu.edu.com

<sup>b</sup>. State Key Laboratory of Oil and Gas Reservoir Geology and Exploitation, Southwest Petroleum University, Chengdu 610500, China.

<sup>c</sup>. School of Materials and Chemical Engineering, Xi'an Technological University, Xi'an, 710021, P. R. China. E-mail: xatuzhou@163.com

<sup>d</sup>. Institute for Frontier Materials, Deakin University, Locked Bag 20000, Geelong, Victoria 3220, Australia. E-mail: weiwei.lei@deakin.edu.au

**Table S1 The ingredients of G<sub>x</sub>B<sub>y</sub>-hydrogels**

|                                      | AA (mL) | MA (mg) | BIS (mg) | KPS (mg) | FeCl <sub>3</sub> (mg) | Water/BN-NH <sub>2</sub><br>dispersions<br>(mL) | Glycerol<br>(mL) |
|--------------------------------------|---------|---------|----------|----------|------------------------|-------------------------------------------------|------------------|
| <b>G<sub>0</sub>B<sub>y</sub></b>    | 1.5     | 196     | 10       | 40       | 40                     | 10                                              | 0                |
| <b>G<sub>1</sub>B<sub>y</sub></b>    | 1.5     | 196     | 10       | 40       | 40                     | 9.9                                             | 0.1              |
| <b>G<sub>2.5</sub>B<sub>y</sub></b>  | 1.5     | 196     | 10       | 40       | 40                     | 9.75                                            | 0.25             |
| <b>G<sub>5</sub>B<sub>y</sub></b>    | 1.5     | 196     | 10       | 40       | 40                     | 9.5                                             | 0.5              |
| <b>G<sub>12.5</sub>B<sub>y</sub></b> | 1.5     | 196     | 10       | 40       | 40                     | 8.75                                            | 1.25             |
| <b>G<sub>25</sub>B<sub>y</sub></b>   | 1.5     | 196     | 10       | 40       | 40                     | 7.5                                             | 2.5              |
| <b>G<sub>50</sub>B<sub>y</sub></b>   | 1.5     | 196     | 10       | 40       | 40                     | 5                                               | 5                |

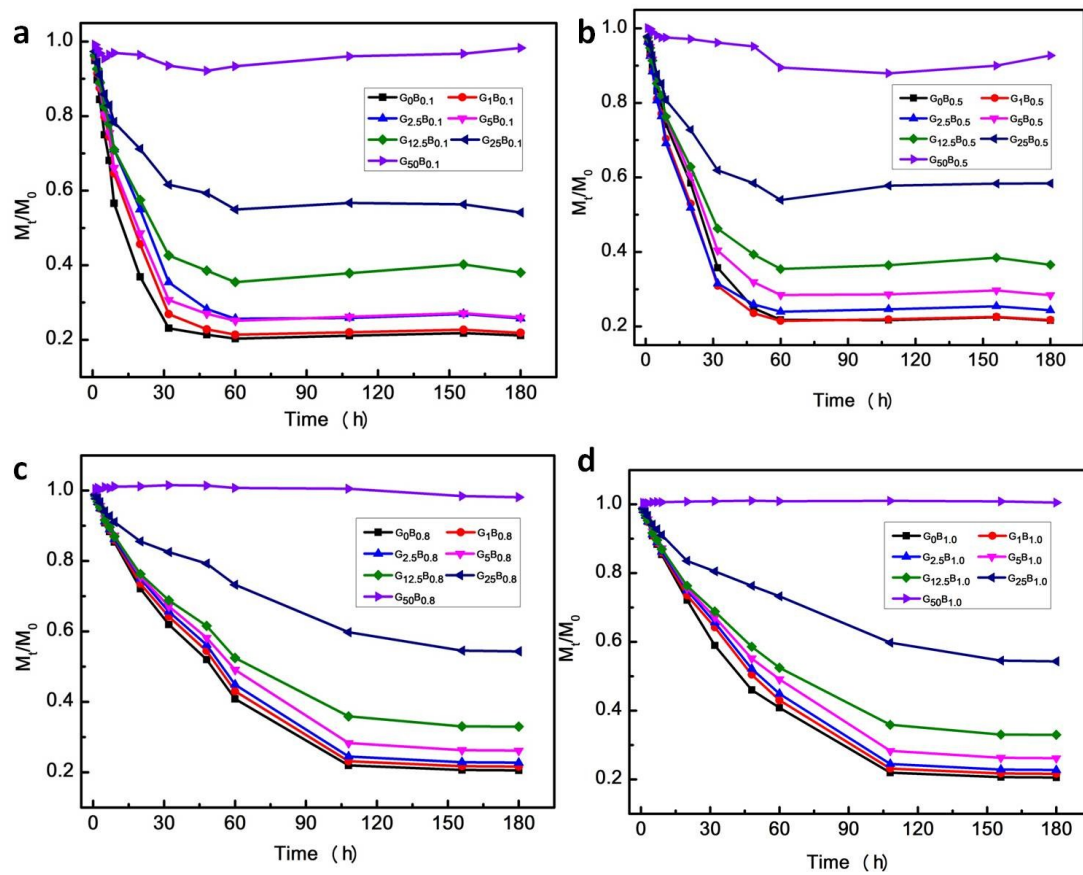

**Fig. S1** The weight changes of (a)  $G_x B_{0.1}$ -hydrogels, (b)  $G_x B_{0.5}$ -hydrogels, (c)  $G_x B_{0.8}$ -hydrogels and (d)  $G_x B_{1.0}$ -hydrogels as a function time ( $M_0$  is the initial weight and  $M_t$  is the weight at different time).

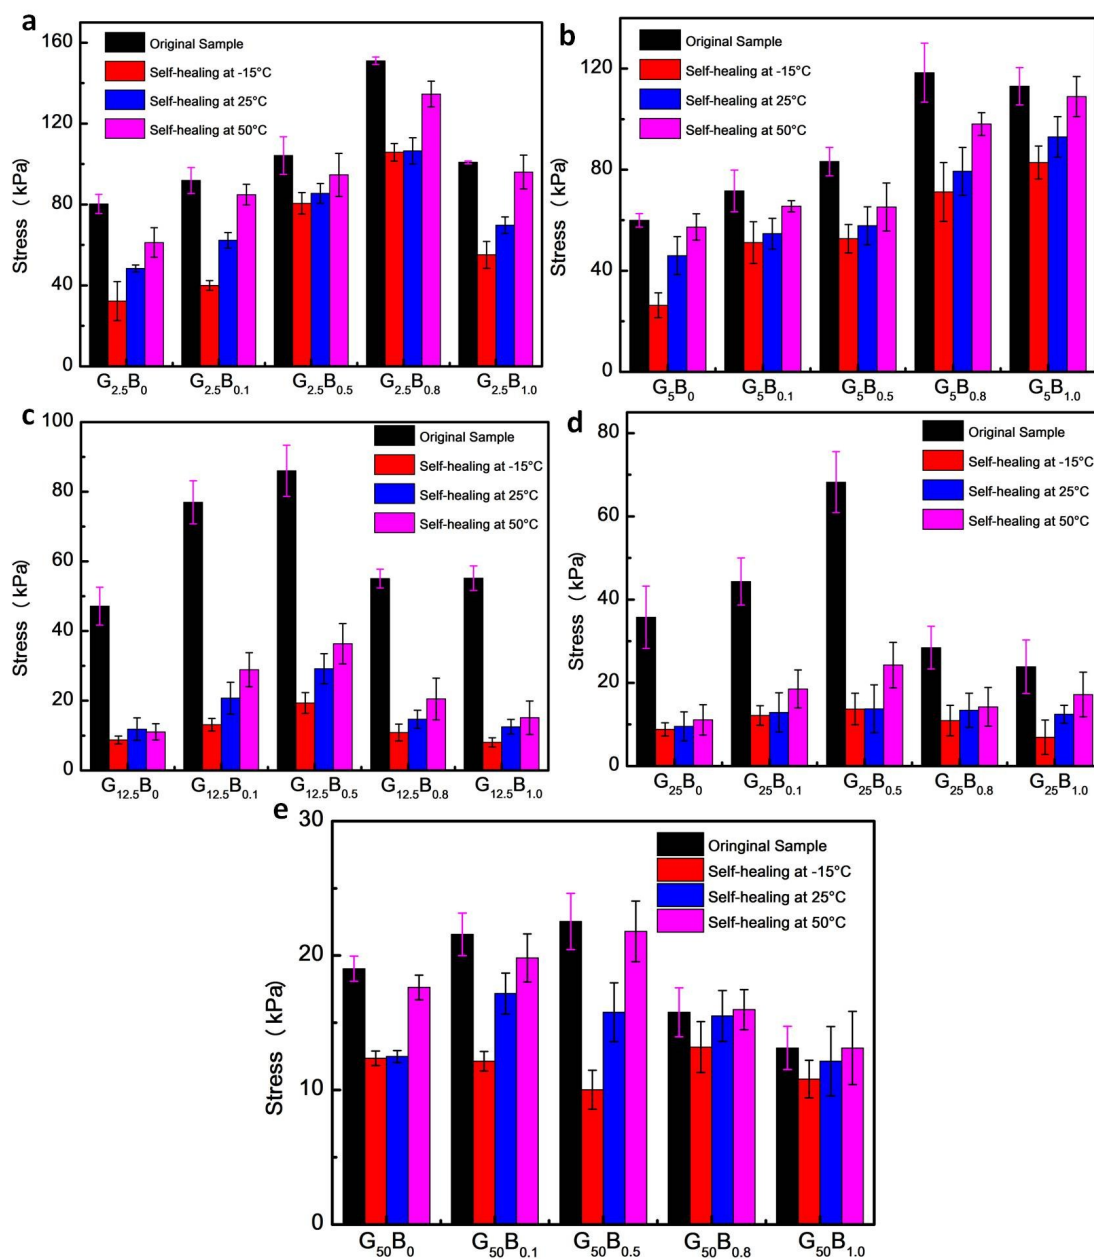

**Fig. S2** The tensile strength of the original and their self-healed (a)  $G_{2.5}B_\gamma$ -hydrogels, (b)  $G_5B_\gamma$ -hydrogels, (c)  $G_{12.5}B_\gamma$ -hydrogels, (d)  $G_{25}B_\gamma$ -hydrogels and (e)  $G_{50}B_\gamma$ -hydrogels at -15 °C, 25 °C and 50 °C for 24 h.
